# Supplementary material
Source: MDPI journal article supplement (https://www.mdpi.com/2073-4433/12/12/1585)
Supplement: s1 [file s1 › atmosphere-1478901-supplementary.pdf]

# Supplementary Materials: Exploring the Change in PM<sub>2.5</sub> and Ozone Concentrations Caused by Aerosol–Radiation Interactions and Aerosol–Cloud Interactions and the Relationship with Meteorological Factors

Xin Zhang <sup>1,\*</sup> Chengduo Yuan <sup>2</sup> and Zibo Zhuang <sup>1</sup>

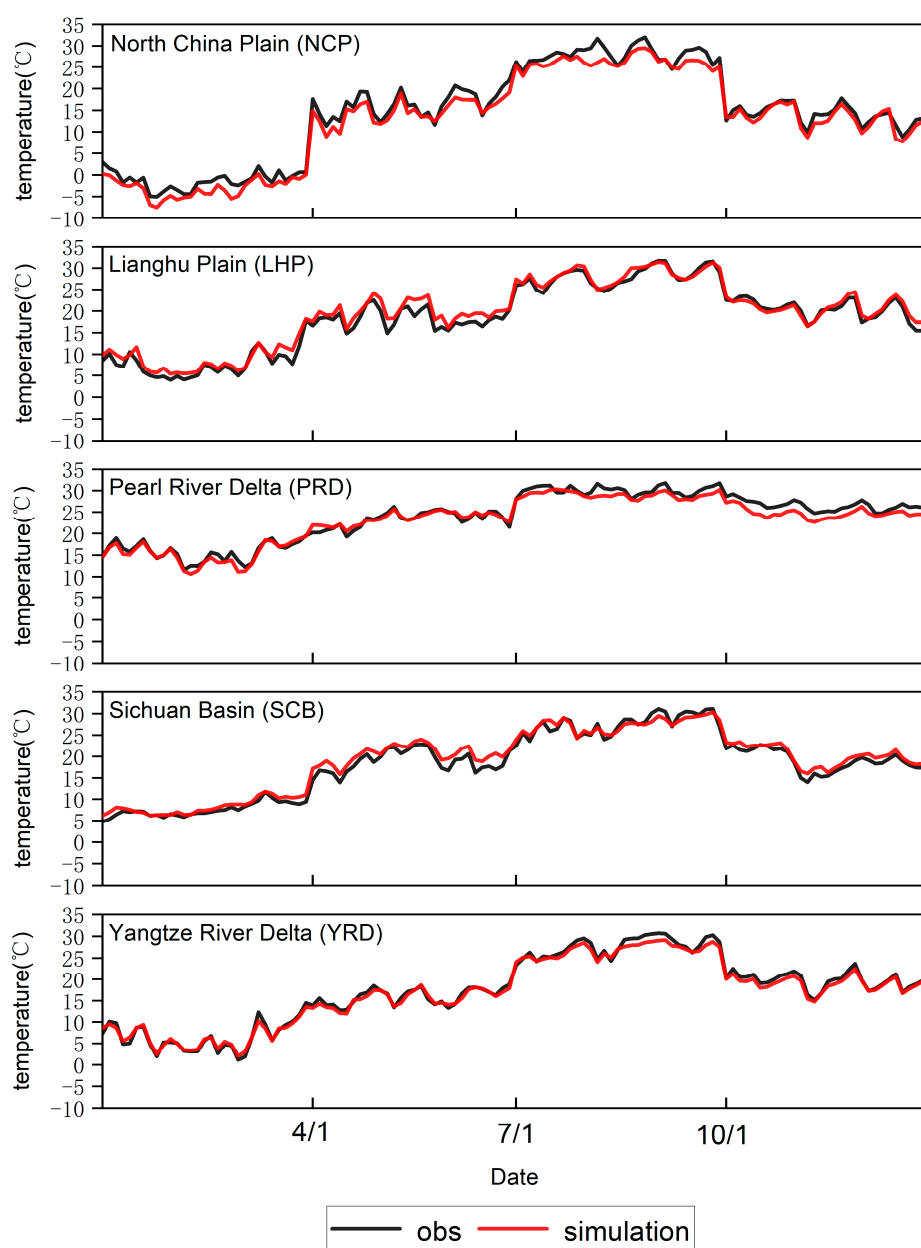

**Figure S1.** Temporal trend of simulated and observed air temperature (°C) at 2 meter level in different regions in January, April, July, and October.

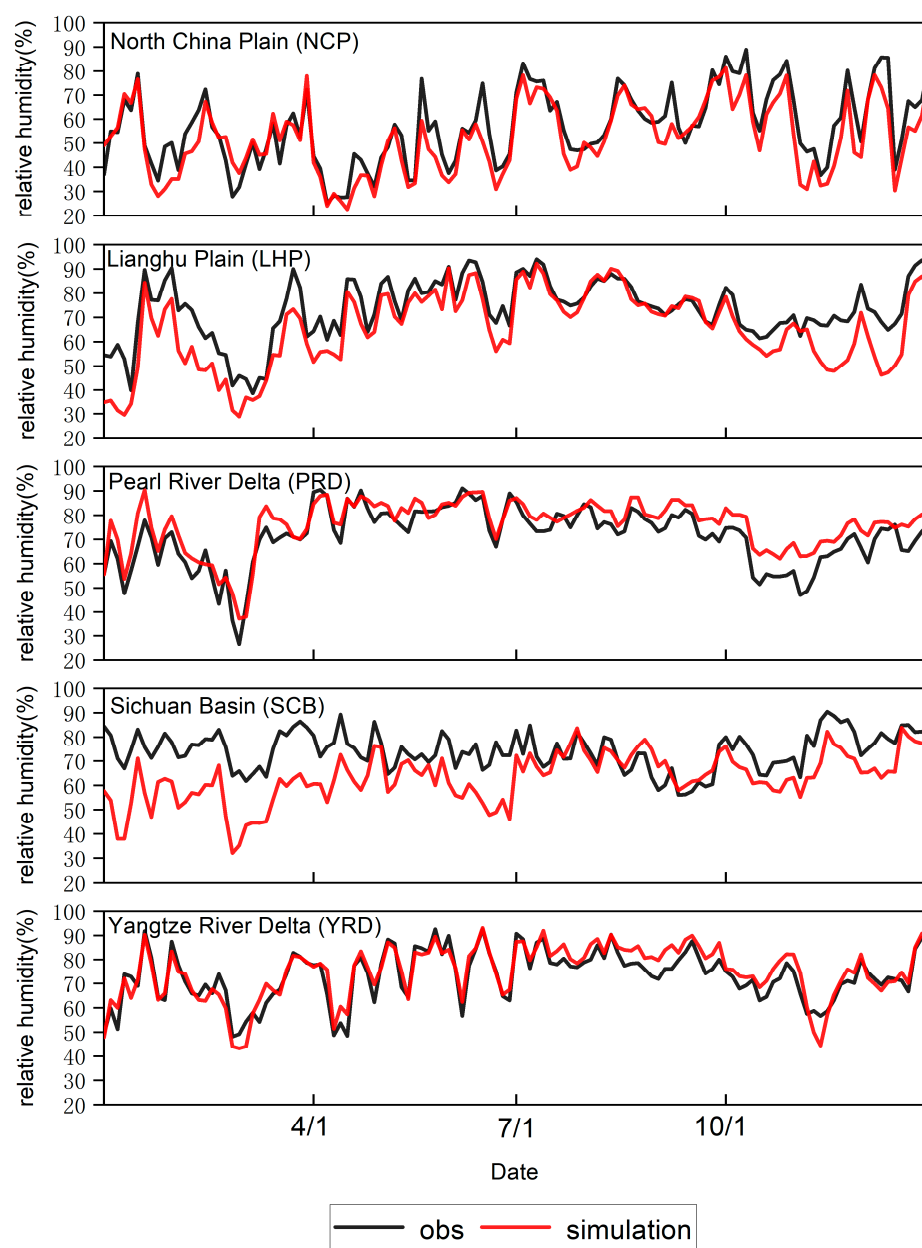

**Figure S2.** Temporal trend of simulated and observed relative humidity (%) at 2 meter level in different regions in January, April, July, and October.

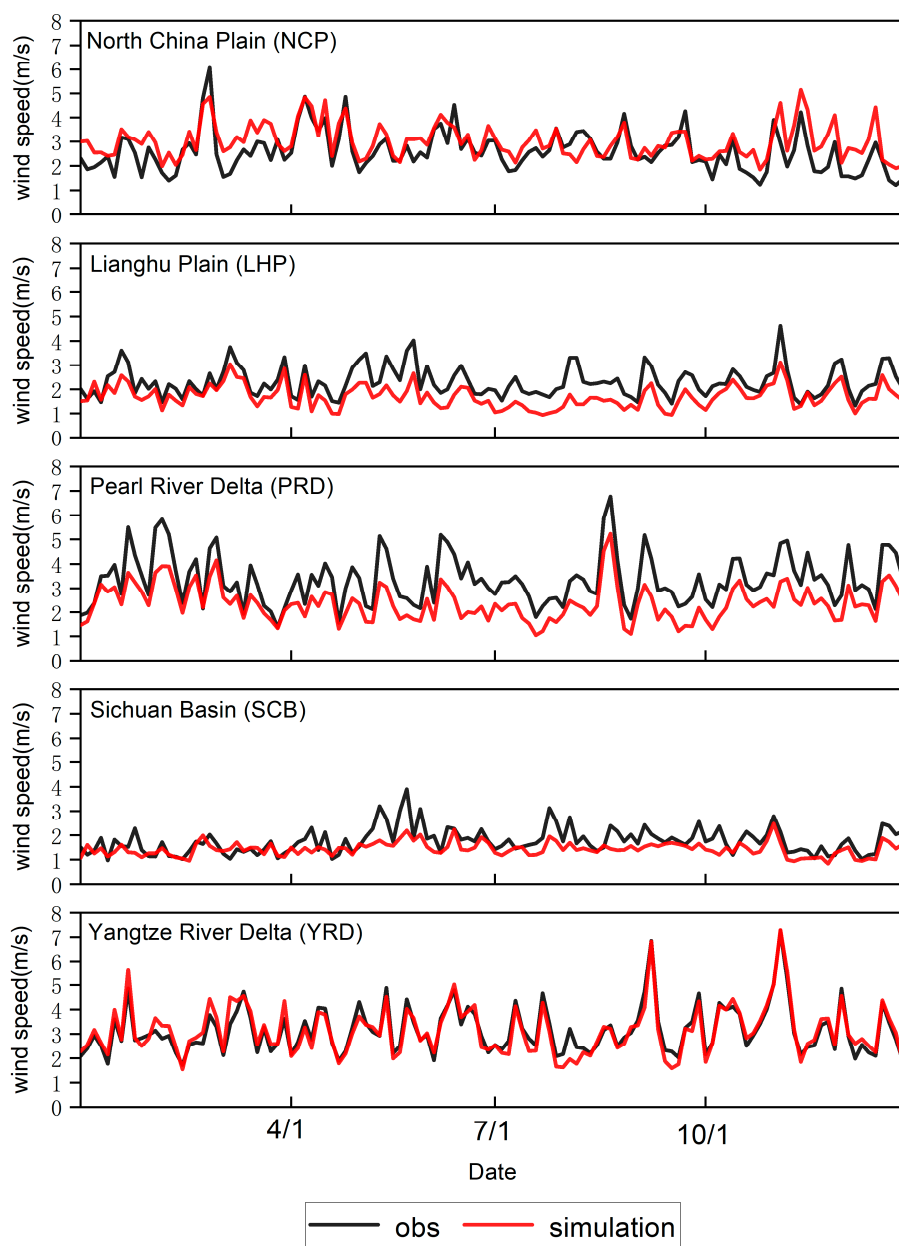

**Figure S3.** Temporal trend of simulated and observed wind speed (m/s) at 10 meter level in different regions in January, April, July, and October.

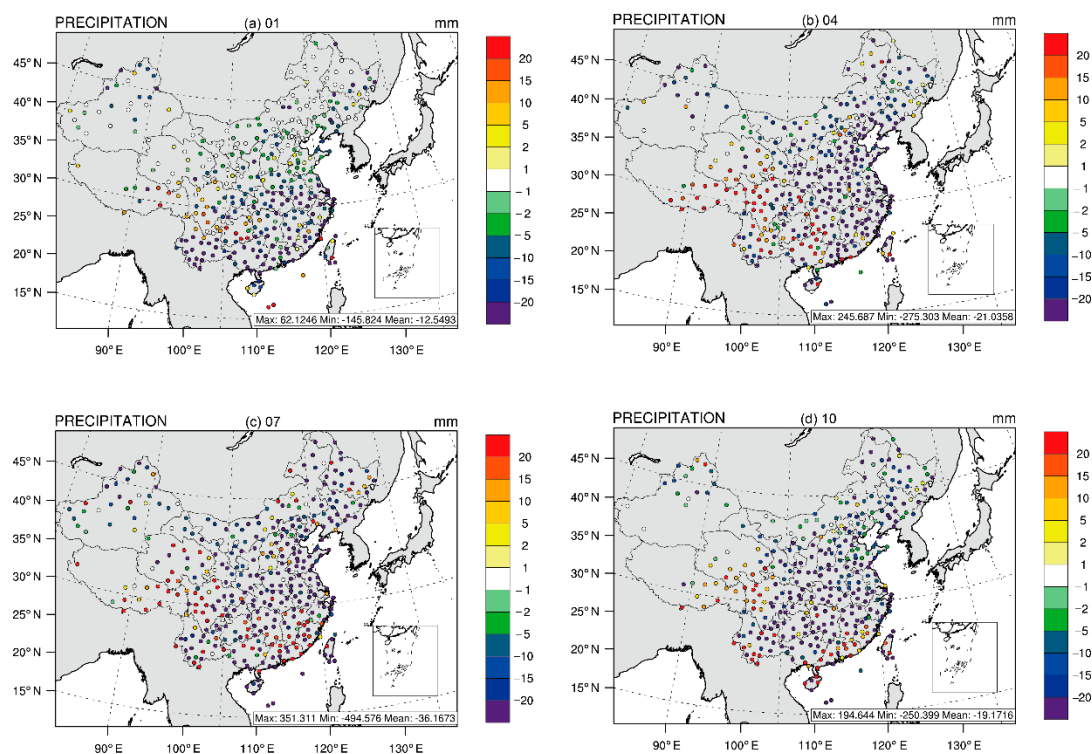

**Figure S4.** The spatial distribution of mean bias of precipitation in different months (unit: mm). Panels a, b, c, and d are for the month of January, April, July, and October respectively.

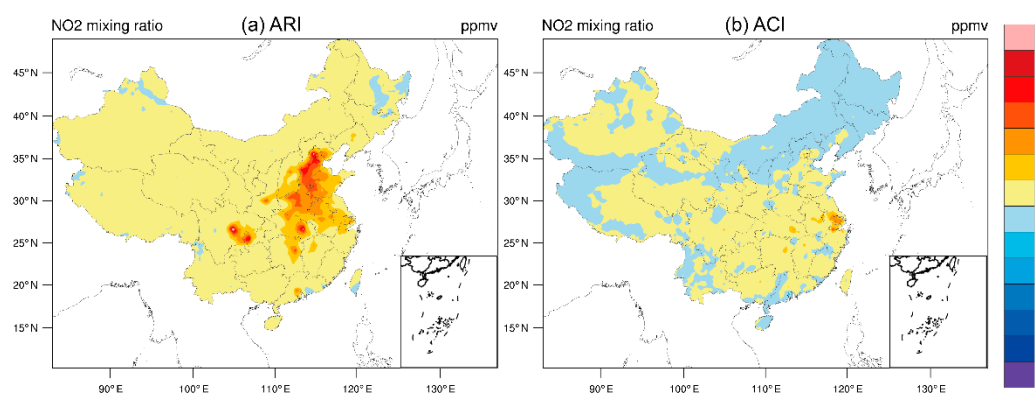

**Figure S5.** Change of NO<sub>2</sub> due to different feedbacks in panel a (for ARIs) and b (for ACIs) (unit: ppmv).
